# Supplementary material
Source: PubMed Central journal article supplement (PMC5630262)
Supplement: NIHMS906909-supplement-Supplemental.pdf [file NIHMS906909-supplement-Supplemental.pdf]

**Supplemental table 1. Primer sequences on genes analyzed by RT-qPCR**

| <b>Gene Name</b> | <b>Forward (5'-3')</b>    | <b>Reverse (5'-3')</b>    |
|------------------|---------------------------|---------------------------|
| <i>ACAN</i>      | AAGGTCTCTCTCTCTCAGCACCCCT | TGGCTGAGGGAATGGACACTGAAA  |
| <i>COL1A1</i>    | GTTCTCAGACTGCCAAAGAAGCCT  | TCCGATGTTTCTGCTTTGTCGTGG  |
| <i>COL2A1</i>    | TTCATCCCACCCTCTCACAGTT    | CCTCTGCCTTGACCCGAA        |
| <i>COL9A1</i>    | TCGATGTGCTGTCTCTGGAGTGAT  | CTTTGCTTTCACATAGAAGCGCTCA |
| <i>IGF1</i>      | TGAAGATGCACACCATGTCCTCCT  | AACTGAAGAGCATCCACCAGCTCA  |
| <i>IGF2</i>      | ACACAGCTCACAGCACACAAACAC  | AGAATCTTAGCGGGACTTTGGCCT  |
| <i>IL-1B</i>     | AACAGGCTGCTCTGGGATTCTCTT  | ATTTCACTGGCGAGCTCAGGTACT  |
| <i>iNOS</i>      | GCGTTACTCCACCAACAATGGCAA  | ATAGCGGATGAGCTGAGCATTCCA  |
| <i>MMP1</i>      | AGTGACTGGGAAACCAGATGCTGA  | TCAGTGAGGACAAACTGAGCCACA  |
| <i>MMP13</i>     | ACAAGTAGTTCCAAAGGCTACAA   | ATAGGAAACATGAGTGCTCCAG    |
| <i>TBP</i>       | GGTGCTAAAGTCAGAGCAGAA     | CAAGGGTACATGAGAGCCATTA    |
